# Supplementary material for: Novel Decision Tool for More Severe α-Thalassemia Genotypes Screening with Functional Loss of Two or More α-Globin Genes: A Diagnostic Test Study
Source: MDPI journal article supplement (doi:10.3390/diagnostics12123008), 2022-12-01
Supplement: s1 [file s1]

## Supplementary Materials

**Table S1.** 2 × 2 Table Comparing BRL Model Prediction Group to Multiplex PCR Results (Training Set)

| Odds Ratio Algorithm                                                                                     | Multiplex PCR Result (Training Set) |         |        |       |
|----------------------------------------------------------------------------------------------------------|-------------------------------------|---------|--------|-------|
|                                                                                                          | Prediction                          | Present | Absent | Total |
| OR = exp [21.905 – 0.284 (MCV standardized by age(fL) + 0.024 (serum ferritin(ng/mL) - 1.142 (Hb A2(%))] | Positive                            | 31      | 16     | 47    |
|                                                                                                          | Negative                            | 4       | 83     | 87    |
|                                                                                                          | Total                               | 35      | 99     | 134   |

**Table S2.** 2 × 2 Table Comparing BRL Model Prediction Group to Multiplex PCR Results (Validation Set)

| Odds Ratio Algorithm                                                                                     | Multiplex PCR Result (Validation Set) |         |        |       |
|----------------------------------------------------------------------------------------------------------|---------------------------------------|---------|--------|-------|
|                                                                                                          | Prediction                            | Present | Absent | Total |
| OR = exp [21.905 – 0.284 (MCV standardized by age(fL) + 0.024 (serum ferritin(ng/mL) - 1.142 (Hb A2(%))] | Positive                              | 39      | 21     | 60    |
|                                                                                                          | Negative                              | 2       | 98     | 100   |
|                                                                                                          | Total                                 | 41      | 119    | 160   |

**Table S3.** 2 × 2 Table Comparing BRL Model Prediction Group to Multiplex PCR Results (Total Sample)

| Odds Ratio Algorithm                                                                                     | Multiplex PCR Result (Total Set) |         |        |       |
|----------------------------------------------------------------------------------------------------------|----------------------------------|---------|--------|-------|
|                                                                                                          | Prediction                       | Present | Absent | Total |
| OR = exp [21.905 – 0.284 (MCV standardized by age(fL) + 0.024 (serum ferritin(ng/mL) - 1.142 (Hb A2(%))] | Positive                         | 70      | 37     | 107   |
|                                                                                                          | Negative                         | 6       | 181    | 187   |
|                                                                                                          | Total                            | 76      | 218    | 294   |
